# Supplementary material for: The Impact of a Very Short Abstinence Period on Assisted Reproductive Technique Outcomes: A Systematic Review and Meta-Analysis
Source: MDPI journal article supplement (doi:10.3390/antiox12030752), 2023-03-20
Supplement: s1 [file s1]

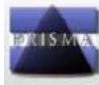

**Table S1 PRISMA Checklist**

| Section and Topic             | Item # | Checklist item                                                                                                                                                                                                                                                                                       | Location where item is reported |
|-------------------------------|--------|------------------------------------------------------------------------------------------------------------------------------------------------------------------------------------------------------------------------------------------------------------------------------------------------------|---------------------------------|
| <b>TITLE</b>                  |        |                                                                                                                                                                                                                                                                                                      |                                 |
| Title                         | 1      | Identify the report as a systematic review.                                                                                                                                                                                                                                                          | 1                               |
| <b>ABSTRACT</b>               |        |                                                                                                                                                                                                                                                                                                      |                                 |
| Abstract                      | 2      | See the PRISMA 2020 for Abstracts checklist.                                                                                                                                                                                                                                                         | 2                               |
| <b>INTRODUCTION</b>           |        |                                                                                                                                                                                                                                                                                                      |                                 |
| Rationale                     | 3      | Describe the rationale for the review in the context of existing knowledge.                                                                                                                                                                                                                          | 3-4                             |
| Objectives                    | 4      | Provide an explicit statement of the objective(s) or question(s) the review addresses.                                                                                                                                                                                                               | 3-4                             |
| <b>METHODS</b>                |        |                                                                                                                                                                                                                                                                                                      |                                 |
| Eligibility criteria          | 5      | Specify the inclusion and exclusion criteria for the review and how studies were grouped for the syntheses.                                                                                                                                                                                          | 5                               |
| Information sources           | 6      | Specify all databases, registers, websites, organisations, reference lists and other sources searched or consulted to identify studies. Specify the date when each source was last searched or consulted.                                                                                            | 4                               |
| Search strategy               | 7      | Present the full search strategies for all databases, registers and websites, including any filters and limits used.                                                                                                                                                                                 | 4- Supp. Tabl.3                 |
| Selection process             | 8      | Specify the methods used to decide whether a study met the inclusion criteria of the review, including how many reviewers screened each record and each report retrieved, whether they worked independently, and if applicable, details of automation tools used in the process.                     | 4-5                             |
| Data collection process       | 9      | Specify the methods used to collect data from reports, including how many reviewers collected data from each report, whether they worked independently, any processes for obtaining or confirming data from study investigators, and if applicable, details of automation tools used in the process. | 4-5                             |
| Data items                    | 10a    | List and define all outcomes for which data were sought. Specify whether all results that were compatible with each outcome domain in each study were sought (e.g. for all measures, time points, analyses), and if not, the methods used to decide which results to collect.                        | 4-5                             |
|                               | 10b    | List and define all other variables for which data were sought (e.g. participant and intervention characteristics, funding sources). Describe any assumptions made about any missing or unclear information.                                                                                         | 4-5                             |
| Study risk of bias assessment | 11     | Specify the methods used to assess risk of bias in the included studies, including details of the tool(s) used, how many reviewers assessed each study and whether they worked independently, and if applicable, details of automation tools used in the process.                                    | 4-5                             |
| Effect measures               | 12     | Specify for each outcome the effect measure(s) (e.g. risk ratio, mean difference) used in the synthesis or presentation of results.                                                                                                                                                                  | 4-5                             |
| Synthesis methods             | 13a    | Describe the processes used to decide which studies were eligible for each synthesis (e.g. tabulating the study intervention characteristics and comparing against the planned groups for each synthesis (item #5)).                                                                                 | 4-6                             |
|                               | 13b    | Describe any methods required to prepare the data for presentation or synthesis, such as handling of missing summary statistics, or data conversions.                                                                                                                                                | 4-6                             |
|                               | 13c    | Describe any methods used to tabulate or visually display results of individual studies and syntheses.                                                                                                                                                                                               | 4-6                             |
|                               | 13d    | Describe any methods used to synthesize results and provide a rationale for the choice(s). If meta-analysis was performed, describe the model(s), method(s) to identify the presence and extent of statistical heterogeneity, and software package(s) used.                                          | 4-6                             |
|                               | 13e    | Describe any methods used to explore possible causes of heterogeneity among study results (e.g. subgroup analysis, meta-regression).                                                                                                                                                                 | 4-6                             |
|                               | 13f    | Describe any sensitivity analyses conducted to assess robustness of the synthesized results.                                                                                                                                                                                                         | 4-6                             |
| Reporting bias assessment     | 14     | Describe any methods used to assess risk of bias due to missing results in a synthesis (arising from reporting biases).                                                                                                                                                                              | 4-6                             |



**Table S1 PRISMA Checklist**

| Section and Topic                              | Item # | Checklist item                                                                                                                                                                                                                                                                       | Location where item is reported |
|------------------------------------------------|--------|--------------------------------------------------------------------------------------------------------------------------------------------------------------------------------------------------------------------------------------------------------------------------------------|---------------------------------|
| Certainty assessment                           | 15     | Describe any methods used to assess certainty (or confidence) in the body of evidence for an outcome.                                                                                                                                                                                | 4-6                             |
| <b>RESULTS</b>                                 |        |                                                                                                                                                                                                                                                                                      |                                 |
| Study selection                                | 16a    | Describe the results of the search and selection process, from the number of records identified in the search to the number of studies included in the review, ideally using a flow diagram.                                                                                         | 6-7                             |
|                                                | 16b    | Cite studies that might appear to meet the inclusion criteria, but which were excluded, and explain why they were excluded.                                                                                                                                                          | 6-7                             |
| Study characteristics                          | 17     | Cite each included study and present its characteristics.                                                                                                                                                                                                                            | 6-10                            |
| Risk of bias in studies                        | 18     | Present assessments of risk of bias for each included study.                                                                                                                                                                                                                         | 6-10                            |
| Results of individual studies                  | 19     | For all outcomes, present, for each study: (a) summary statistics for each group (where appropriate) and (b) an effect estimate and its precision (e.g. confidence/credible interval), ideally using structured tables or plots.                                                     | 6-12                            |
| Results of syntheses                           | 20a    | For each synthesis, briefly summarise the characteristics and risk of bias among contributing studies.                                                                                                                                                                               | 6-12                            |
|                                                | 20b    | Present results of all statistical syntheses conducted. If meta-analysis was done, present for each the summary estimate and its precision (e.g. confidence/credible interval) and measures of statistical heterogeneity. If comparing groups, describe the direction of the effect. | 6-12                            |
|                                                | 20c    | Present results of all investigations of possible causes of heterogeneity among study results.                                                                                                                                                                                       | 6-12                            |
|                                                | 20d    | Present results of all sensitivity analyses conducted to assess the robustness of the synthesized results.                                                                                                                                                                           | 6-12                            |
| Reporting biases                               | 21     | Present assessments of risk of bias due to missing results (arising from reporting biases) for each synthesis assessed.                                                                                                                                                              | 6-12                            |
| Certainty of evidence                          | 22     | Present assessments of certainty (or confidence) in the body of evidence for each outcome assessed.                                                                                                                                                                                  | 6-12                            |
| <b>DISCUSSION</b>                              |        |                                                                                                                                                                                                                                                                                      |                                 |
| Discussion                                     | 23a    | Provide a general interpretation of the results in the context of other evidence.                                                                                                                                                                                                    | 12-15                           |
|                                                | 23b    | Discuss any limitations of the evidence included in the review.                                                                                                                                                                                                                      | 12-15                           |
|                                                | 23c    | Discuss any limitations of the review processes used.                                                                                                                                                                                                                                | 12-15                           |
|                                                | 23d    | Discuss implications of the results for practice, policy, and future research.                                                                                                                                                                                                       | 12-15                           |
| <b>OTHER INFORMATION</b>                       |        |                                                                                                                                                                                                                                                                                      |                                 |
| Registration and protocol                      | 24a    | Provide registration information for the review, including register name and registration number, or state that the review was not registered.                                                                                                                                       | -                               |
|                                                | 24b    | Indicate where the review protocol can be accessed, or state that a protocol was not prepared.                                                                                                                                                                                       | -                               |
|                                                | 24c    | Describe and explain any amendments to information provided at registration or in the protocol.                                                                                                                                                                                      | -                               |
| Support                                        | 25     | Describe sources of financial or non-financial support for the review, and the role of the funders or sponsors in the review.                                                                                                                                                        | 16                              |
| Competing interests                            | 26     | Declare any competing interests of review authors.                                                                                                                                                                                                                                   | 16                              |
| Availability of data, code and other materials | 27     | Report which of the following are publicly available and where they can be found: template data collection forms; data extracted from included studies; data used for all analyses; analytic code; any other materials used in the review.                                           | -                               |

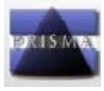

## Table S1 PRISMA Checklist

For more information, visit: <http://www.prisma-statement.org/>

**Table S2 MOOSE Checklist for Meta-analyses of Observational Studies**

| Item No                                     | Recommendation                                                                                                                                                                                                                                                                 | Reported on Page No |
|---------------------------------------------|--------------------------------------------------------------------------------------------------------------------------------------------------------------------------------------------------------------------------------------------------------------------------------|---------------------|
| Reporting of background should include      |                                                                                                                                                                                                                                                                                |                     |
| 1                                           | Problem definition                                                                                                                                                                                                                                                             | 3-4                 |
| 2                                           | Hypothesis statement                                                                                                                                                                                                                                                           | 4                   |
| 3                                           | Description of study outcome(s)                                                                                                                                                                                                                                                | 4-5                 |
| 4                                           | Type of exposure or intervention used                                                                                                                                                                                                                                          | 5                   |
| 5                                           | Type of study designs used                                                                                                                                                                                                                                                     | 5                   |
| 6                                           | Study population                                                                                                                                                                                                                                                               | 5                   |
| Reporting of search strategy should include |                                                                                                                                                                                                                                                                                |                     |
| 7                                           | Qualifications of searchers (e.g., librarians and investigators)                                                                                                                                                                                                               | 4                   |
| 8                                           | Search strategy, including time period included in the synthesis and key words                                                                                                                                                                                                 | 4                   |
| 9                                           | Effort to include all available studies, including contact with authors                                                                                                                                                                                                        | 4                   |
| 10                                          | Databases and registries searched                                                                                                                                                                                                                                              | 4                   |
| 11                                          | Search software used, name and version, including special features used (eg, explosion)                                                                                                                                                                                        | 4                   |
| 12                                          | Use of hand searching (e.g., reference lists of obtained articles)                                                                                                                                                                                                             | 4                   |
| 13                                          | List of citations located and those excluded, including justification                                                                                                                                                                                                          | 7                   |
| 14                                          | Method of addressing articles published in languages other than English                                                                                                                                                                                                        | -                   |
| 15                                          | Method of handling abstracts and unpublished studies                                                                                                                                                                                                                           | -                   |
| 16                                          | Description of any contact with authors                                                                                                                                                                                                                                        | 4                   |
| Reporting of methods should include         |                                                                                                                                                                                                                                                                                |                     |
| 17                                          | Description of relevance or appropriateness of studies assembled for assessing the hypothesis to be tested                                                                                                                                                                     | 4-6                 |
| 18                                          | Rationale for the selection and coding of data (e.g., sound clinical principles or convenience)                                                                                                                                                                                | 4-6                 |
| 19                                          | Documentation of how data were classified and coded (eg, multiple raters, blinding and interrater reliability)                                                                                                                                                                 | 4-6                 |
| 20                                          | Assessment of confounding (e.g., comparability of cases and controls in studies where appropriate)                                                                                                                                                                             | 4-6                 |
| 21                                          | Assessment of study quality, including blinding of quality assessors, stratification or regression on possible predictors of study results                                                                                                                                     | 4-6                 |
| 22                                          | Assessment of heterogeneity                                                                                                                                                                                                                                                    | 4-6                 |
| 23                                          | Description of statistical methods (e.g., complete description of fixed or random effects models, justification of whether the chosen models account for predictors of study results, dose-response models, or cumulative meta-analysis) in sufficient detail to be replicated | 4-6                 |
| 24                                          | Provision of appropriate tables and graphics                                                                                                                                                                                                                                   | 4-6                 |
| Reporting of results should include         |                                                                                                                                                                                                                                                                                |                     |
| 25                                          | Graphic summarizing individual study estimates and overall estimate                                                                                                                                                                                                            | 7                   |
| 26                                          | Table giving descriptive information for each study included                                                                                                                                                                                                                   | Table 3             |
| 27                                          | Results of sensitivity testing (e.g., subgroup analysis)                                                                                                                                                                                                                       | 10-12               |
| 28                                          | Indication of statistical uncertainty of findings                                                                                                                                                                                                                              | 10-12               |

| Item No                                 | Recommendation                                                                                                              | Reported on Page No |
|-----------------------------------------|-----------------------------------------------------------------------------------------------------------------------------|---------------------|
| Reporting of discussion should include  |                                                                                                                             |                     |
| 29                                      | Quantitative assessment of bias (e.g., publication bias)                                                                    | 10-12               |
| 30                                      | Justification for exclusion (e.g., exclusion of non-English language citations)                                             | 6-7                 |
| 31                                      | Assessment of quality of included studies                                                                                   | Table 2             |
| Reporting of conclusions should include |                                                                                                                             |                     |
| 32                                      | Consideration of alternative explanations for observed results                                                              | 12-15               |
| 33                                      | Generalization of the conclusions (i.e., appropriate for the data presented and within the domain of the literature review) | 12-15               |
| 34                                      | Guidelines for future research                                                                                              | 12-15               |
| 35                                      | Disclosure of funding source                                                                                                | 16                  |

From: Stroup et al., for the Meta-Analysis of Observational Studies in Epidemiology (MOOSE) Group. Meta-Analysis of Observational Studies in Epidemiology. A Proposal for Reporting. JAMA. 2000;283(15):2008-2012. doi: 10.1001/jama.283.15.2008.

**Supplementary table S3.** Specific search strings used for each database queried.

| Database searched | Search String                                                                                                                                                                                                                                                                                                                                                                                                                                                                                                                                                                                                                                                                                                                                                |
|-------------------|--------------------------------------------------------------------------------------------------------------------------------------------------------------------------------------------------------------------------------------------------------------------------------------------------------------------------------------------------------------------------------------------------------------------------------------------------------------------------------------------------------------------------------------------------------------------------------------------------------------------------------------------------------------------------------------------------------------------------------------------------------------|
| Scopus            | TITLE-ABS-KEY(assisted reproductive techn* AND consecutive ejaculat*) OR TITLE-ABS-KEY(ART AND consecutive ejaculat*) OR TITLE-ABS-KEY(assisted reproductive techn* AND repeated ejaculat*) OR TITLE-ABS-KEY(ART AND repeated ejaculat*) OR TITLE-ABS-KEY(assisted reproductive techn* AND second ejaculat*) OR TITLE-ABS-KEY(ART AND second ejaculat*) OR TITLE-ABS-KEY(assisted reproductive techn* AND consecutive semen collection) OR TITLE-ABS-KEY(ART AND consecutive semen collection) OR TITLE-ABS-KEY(assisted reproductive techn* AND repeated semen collection) OR TITLE-ABS-KEY(ART AND repeated semen collection) OR TITLE-ABS-KEY(assisted reproductive techn* AND second semen collection) OR TITLE-ABS-KEY(ART AND second semen collection) |
| PubMed            | (assisted reproductive techn* AND consecutive ejaculat*) OR (ART AND consecutive ejaculat*) OR (assisted reproductive techn* AND repeated ejaculat*) OR (ART AND repeated ejaculat*) OR (assisted reproductive techn* AND second ejaculat*) OR (ART AND second ejaculat*) OR (assisted reproductive techn* AND consecutive semen collection) OR (ART AND consecutive semen collection) OR (assisted reproductive techn* AND repeated semen collection) OR (ART AND repeated semen collection) OR (assisted reproductive techn* AND second semen collection) OR (ART AND second semen collection)                                                                                                                                                             |
| Web of Science    | ALL=(assisted reproductive techn* AND consecutive ejaculat*) OR ALL=(ART AND consecutive ejaculat*) OR ALL=(assisted reproductive techn* AND repeated ejaculat*) OR ALL=(ART AND repeated ejaculat*) OR ALL=(assisted reproductive techn* AND second ejaculat*) OR ALL=(ART AND second ejaculat*) OR ALL=(assisted reproductive techn* AND consecutive semen collection) OR ALL=(ART AND consecutive semen collection) OR ALL=(assisted reproductive techn* AND repeated semen collection) OR ALL=(ART AND repeated semen collection) OR ALL=(assisted reproductive techn* AND second semen collection) OR ALL=(ART AND second semen collection)                                                                                                             |
| Cochrane Review   | (assisted reproductive techn* AND consecutive ejaculat*) OR (ART AND consecutive ejaculat*) OR (assisted reproductive techn* AND repeated ejaculat*) OR (ART AND repeated ejaculat*) OR (assisted reproductive techn* AND second ejaculat*) OR (ART AND second ejaculat*) OR (assisted reproductive techn* AND consecutive semen collection) OR (ART AND consecutive semen collection) OR (assisted reproductive techn* AND repeated semen collection) OR (ART AND repeated semen collection) OR (assisted reproductive techn* AND second semen collection) OR (ART AND second semen collection)                                                                                                                                                             |

**Supplementary Figure S1.** Funnel plot (A) and sensitivity analysis (B) of studies that evaluated the effects of a very short abstinence period on fertilization rate

A

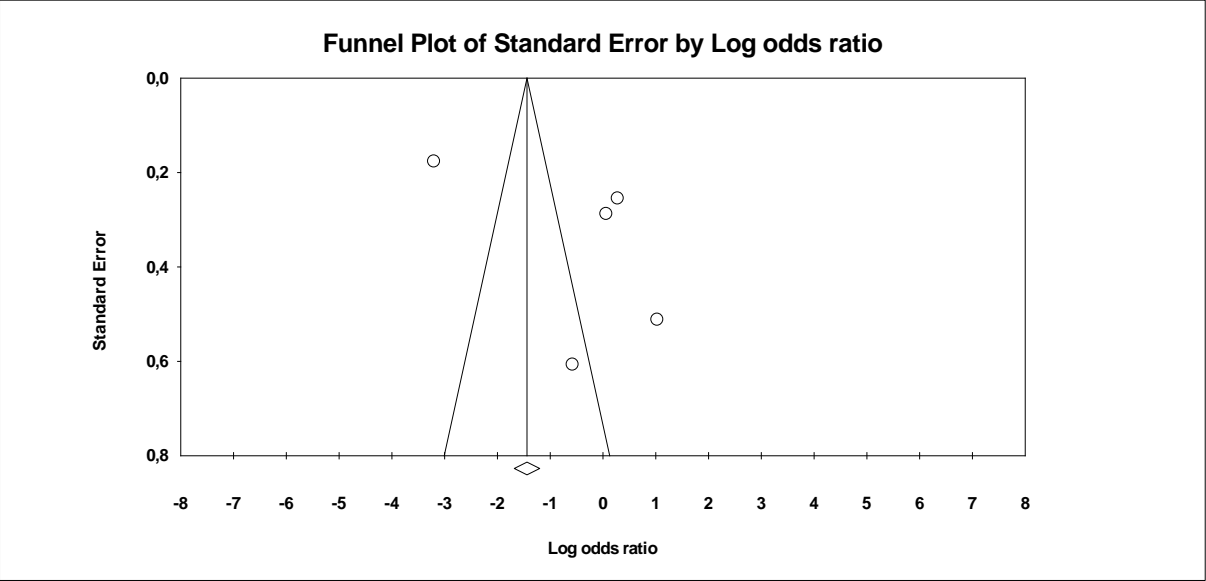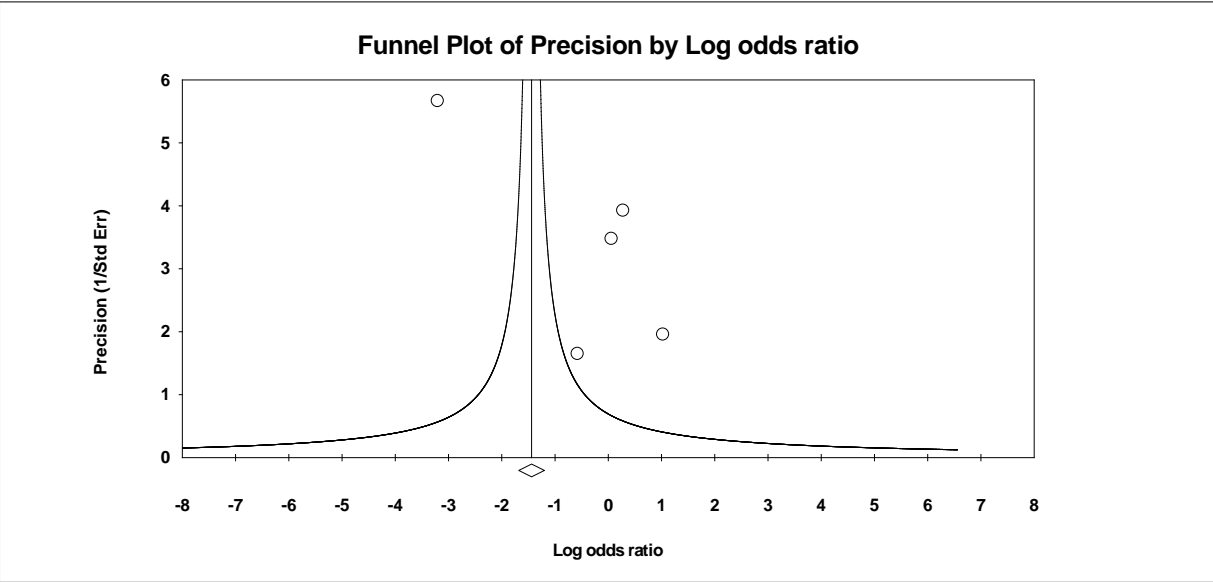

B

Sensitivity analysis

| Study name              | Statistics with study removed |             |             |         |         | Odds ratio (95% CI)<br>with study removed |
|-------------------------|-------------------------------|-------------|-------------|---------|---------|-------------------------------------------|
|                         | Point                         | Lower limit | Upper limit | Z-Value | p-Value |                                           |
| Barbagallo et al., 2021 | 0,501                         | 0,054       | 4,653       | -0,608  | 0,543   |                                           |
| Ciotti et al., 2021     | 0,621                         | 0,072       | 5,344       | -0,433  | 0,665   |                                           |
| Patel et al., 2022      | 1,251                         | 0,799       | 1,958       | 0,978   | 0,328   |                                           |
| Scarselli et al., 2019  | 0,530                         | 0,053       | 5,306       | -0,540  | 0,589   |                                           |
| Sugiyam et al., 2008    | 0,420                         | 0,053       | 3,312       | -0,823  | 0,410   |                                           |
|                         | 0,609                         | 0,094       | 3,928       | -0,521  | 0,602   |                                           |
|                         |                               |             |             |         |         | 0,01 0,1 1 10 100                         |
|                         |                               |             |             |         |         | Favours second ejac. Favours first ejac.  |

**Supplementary Figure S2.** Funnel plot (A) and sensitivity analysis (B) of studies that evaluated the effects of a very short abstinence period on implantation rate

A

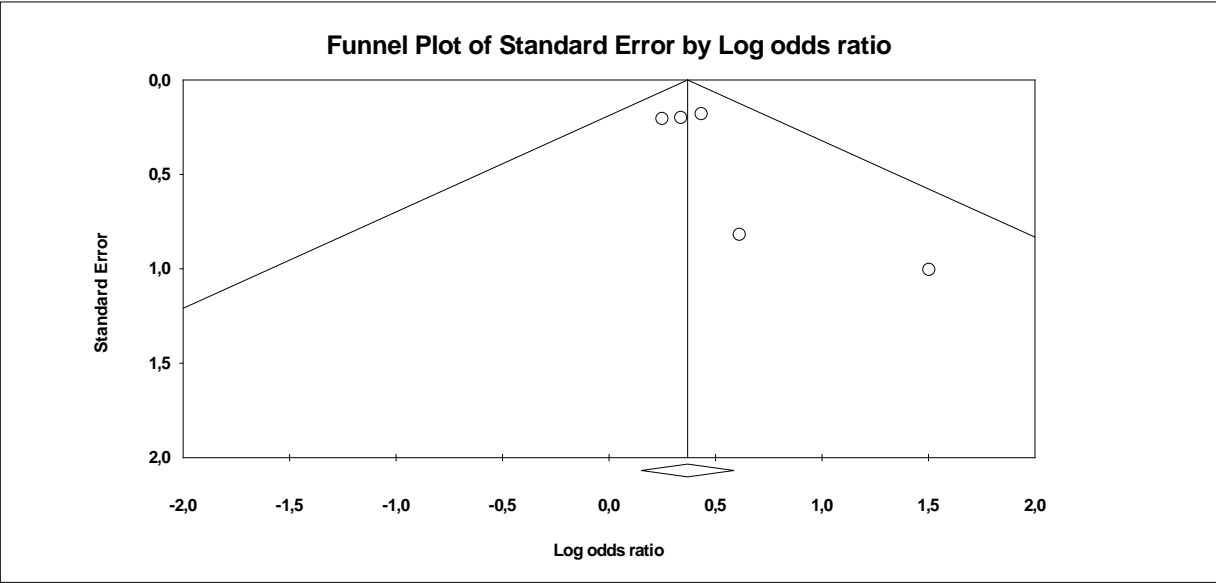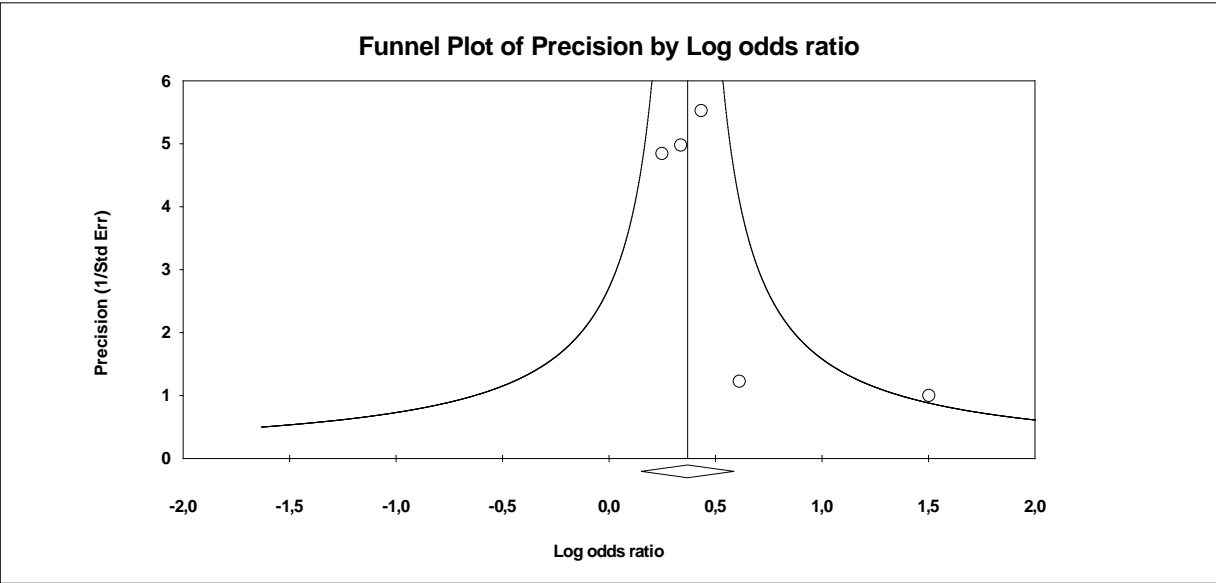

B

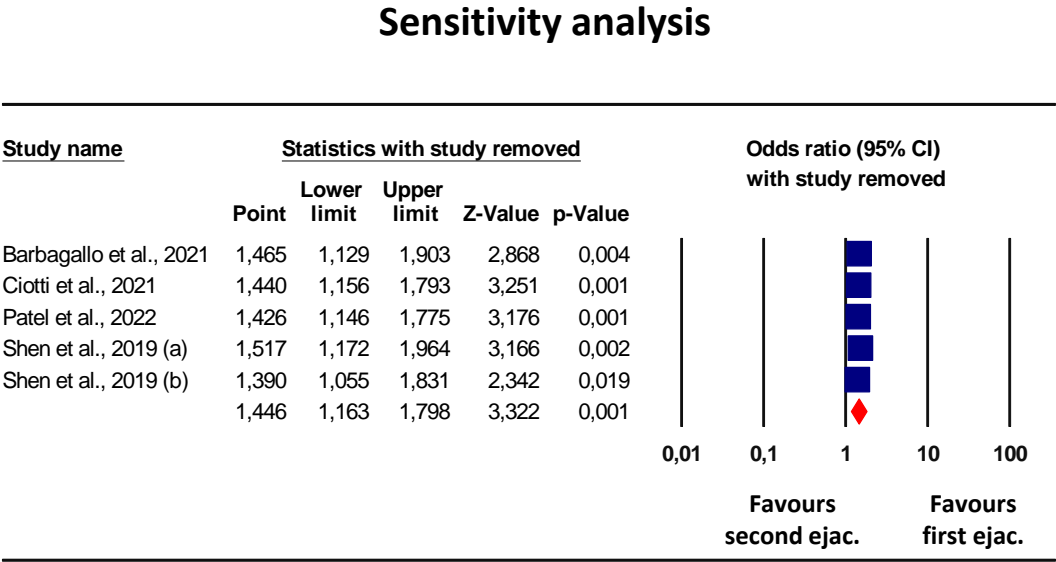



**Supplementary Figure S3.** Funnel plot (A) and sensitivity analysis (B) of studies that evaluated the effects of a very short abstinence period on clinical pregnancy rate

A

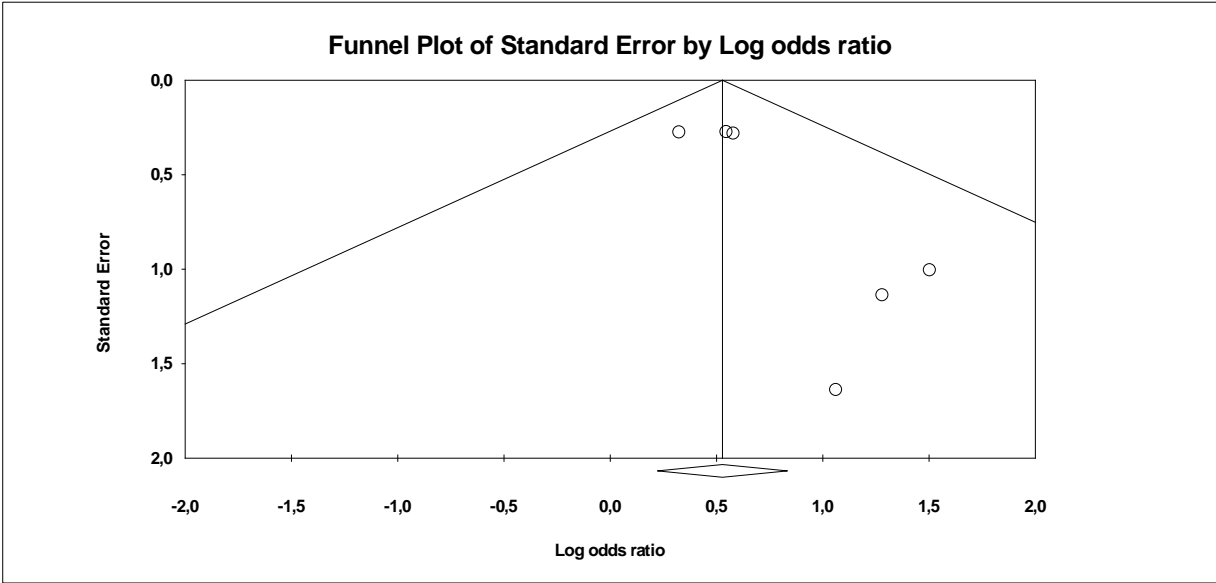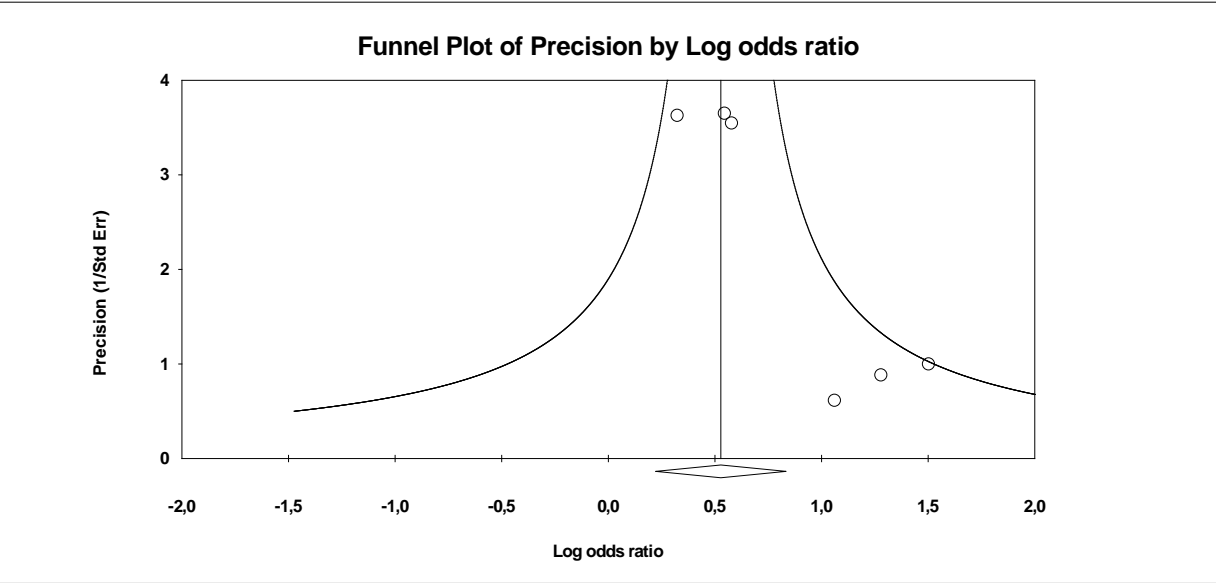

B

Sensitivity analysis

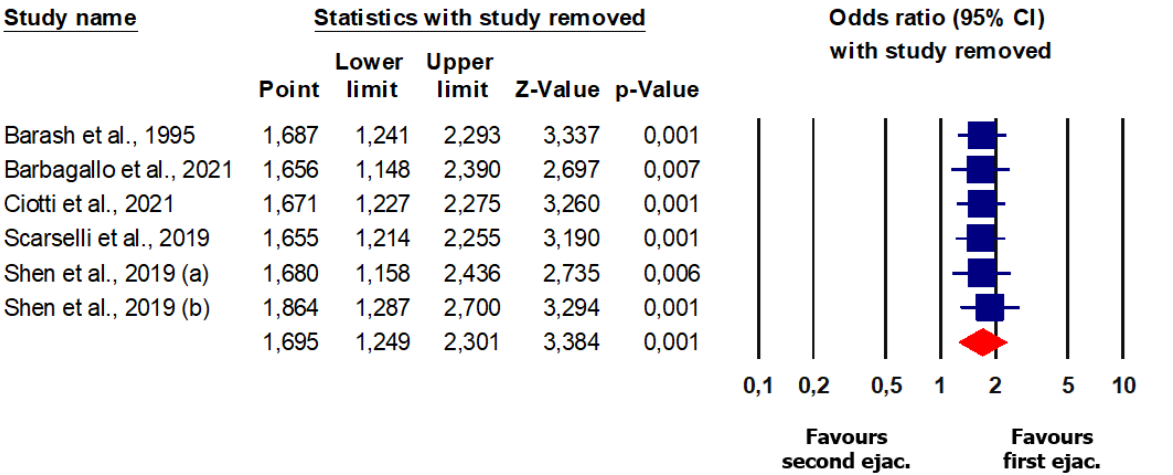

**Supplementary Figure S4.** Funnel plot (A) and sensitivity analysis (B) of studies that evaluated the effects of a very short abstinence period on clinical pregnancy rate

A

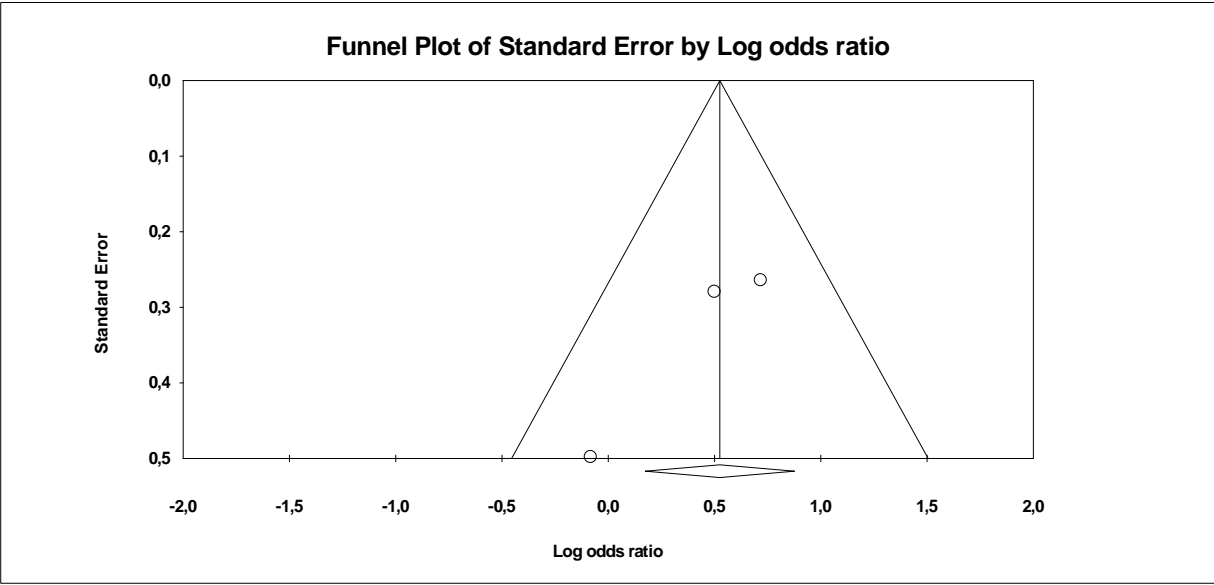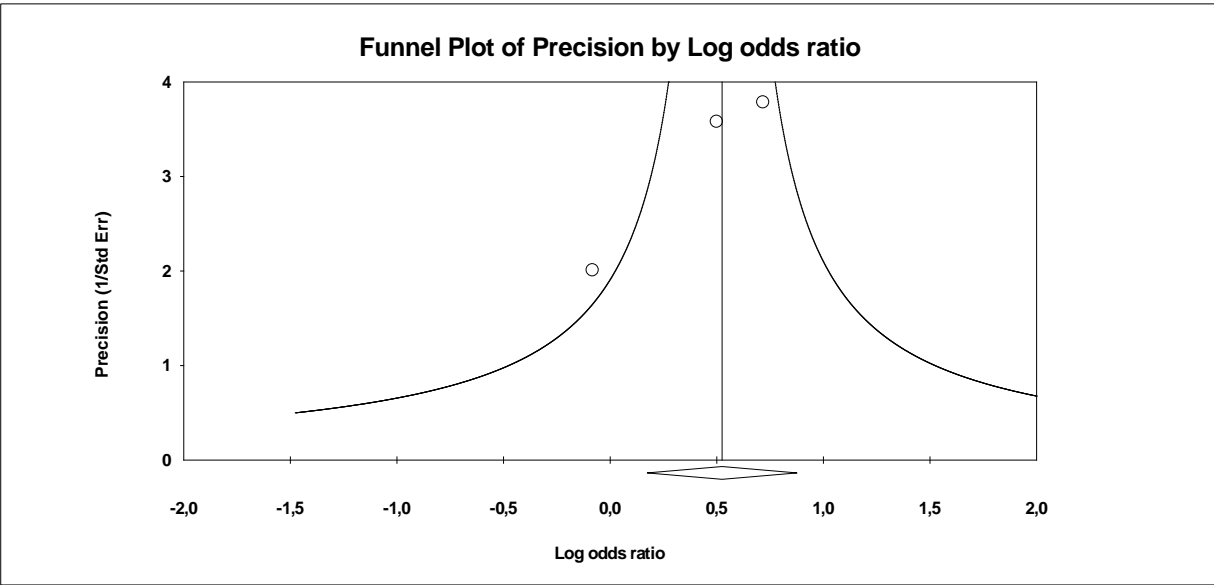

B

Sensitivity analysis

| Study name              | Statistics with study removed |             |             |         |         | Odds ratio (95% CI)<br>with study removed   |
|-------------------------|-------------------------------|-------------|-------------|---------|---------|---------------------------------------------|
|                         | Point                         | Lower limit | Upper limit | Z-Value | p-Value |                                             |
| Barbagallo et al., 2021 | 1,850                         | 1,270       | 2,695       | 3,204   | 0,001   |                                             |
| Shen et al., 2019 (a)   | 1,720                         | 1,088       | 2,718       | 2,323   | 0,020   |                                             |
| Shen et al., 2019 (b)   | 1,435                         | 0,890       | 2,313       | 1,481   | 0,139   |                                             |
|                         | 1,690                         | 1,190       | 2,402       | 2,930   | 0,003   |                                             |
|                         |                               |             |             |         |         | 0,01    0,1    1    10    100               |
|                         |                               |             |             |         |         | Favours second ejac.    Favours first ejac. |

**Supplementary Figure S5.** Funnel plot (A) and sensitivity analysis (B) of studies that evaluated the effects of a very short abstinence period on miscarriage rate

A

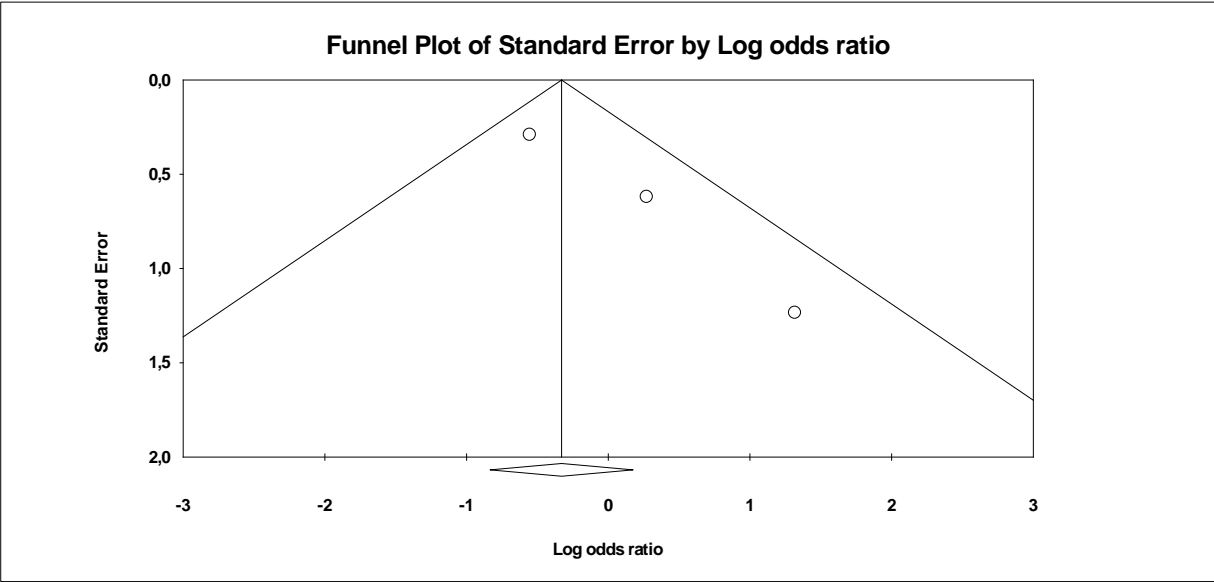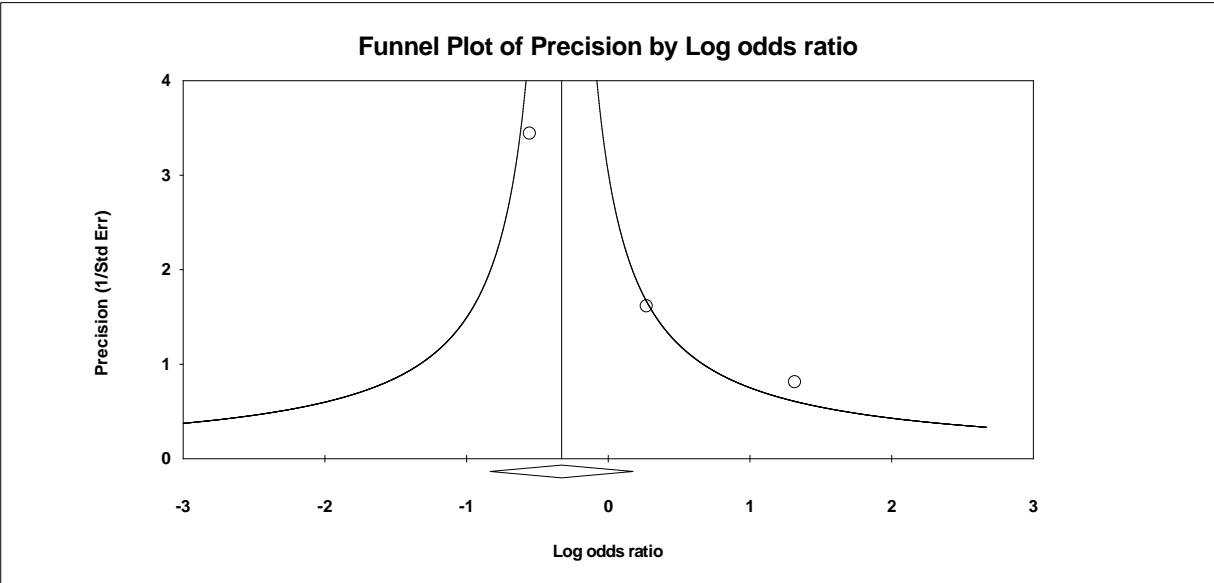

B

Sensitivity analysis

| Study name              | Statistics with study removed |             |             |         |         | Odds ratio (95% CI)<br>with study removed   |
|-------------------------|-------------------------------|-------------|-------------|---------|---------|---------------------------------------------|
|                         | Point                         | Lower limit | Upper limit | Z-Value | p-Value |                                             |
| Barbagallo et al., 2021 | 1,621                         | 0,547       | 4,802       | 0,871   | 0,384   |                                             |
| Shen et al., 2019 (a)   | 0,635                         | 0,364       | 1,105       | -1,607  | 0,108   |                                             |
| Shen et al., 2019 (b)   | 0,667                         | 0,398       | 1,118       | -1,536  | 0,125   |                                             |
|                         | 0,719                         | 0,434       | 1,191       | -1,280  | 0,201   |                                             |
|                         |                               |             |             |         |         | 0,01    0,1    1    10    100               |
|                         |                               |             |             |         |         | Favours second ejac.    Favours first ejac. |
